# Supplementary material for: Catalytic decomposition of dibenzothiophene sulfone over K-based oxides supported on alumina
Source: Royal Society of Chemistry journal article supplement (doi:10.1039/d1nj05313b), 2022-01-01
Supplement: d1nj05313b1.pdf [file d1nj05313b1.pdf]

**New Journal of Chemistry**

**Title:** Catalytic decomposition of dibenzothiophene sulfone over K-based Oxides  
supported on alumina

**Authors:** Hao Liu <sup>a,b</sup>, Yaowei Wang <sup>c</sup>, Fengqi Zhang <sup>c</sup>, Congcong Xu <sup>c</sup>, Xiaoyuan Liao  
<sup>a,b</sup>, Yan Jiang <sup>a,b</sup> and Shuxiang Lu <sup>\* a,b</sup>

**Manuscript number:** NJ-ART-11-2021-005313

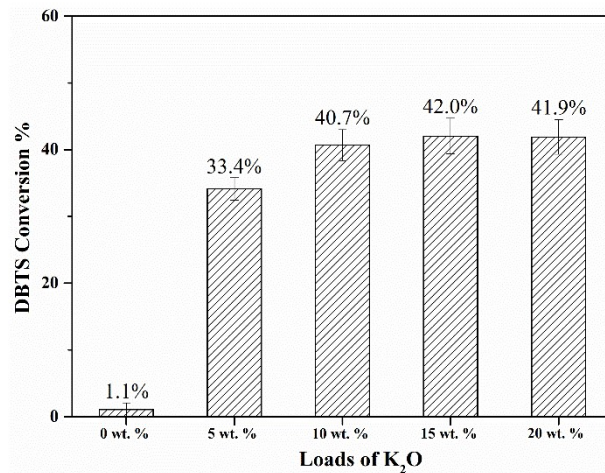

**Fig. S.1** The conversion of DBTS on different loads of K<sub>2</sub>O supported on 1-Al<sub>2</sub>O<sub>3</sub> at 260°C, N<sub>2</sub> atmosphere and the reaction time of 20 min

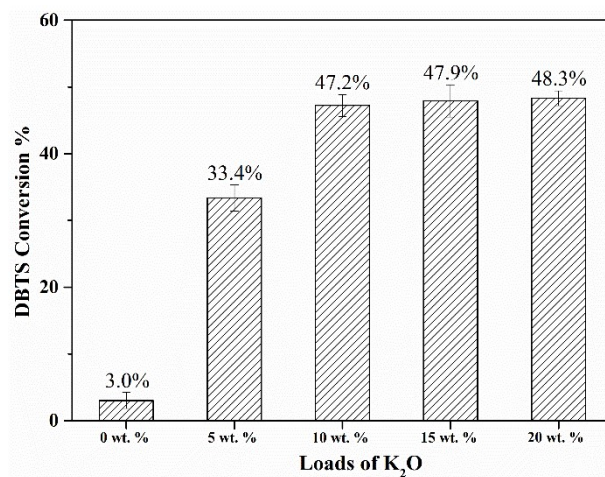

**Fig. S.2** The conversion of DBTS on different loads of K<sub>2</sub>O supported on 2-Al<sub>2</sub>O<sub>3</sub> at 260°C, N<sub>2</sub> atmosphere and the reaction time of 20 min

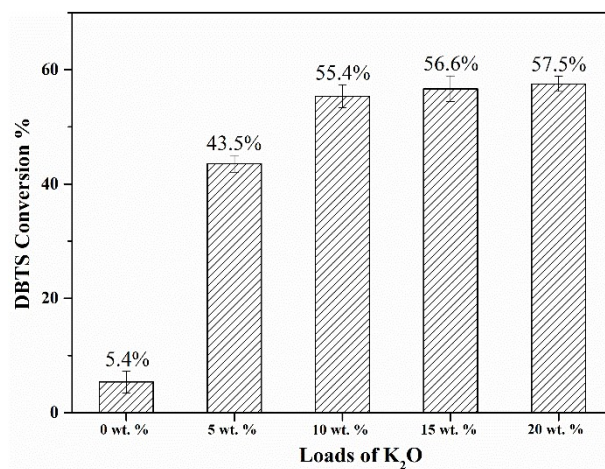

**Fig. S.3** The conversion of DBTS on different loads of K<sub>2</sub>O supported on 3-Al<sub>2</sub>O<sub>3</sub> at 260°C, N<sub>2</sub> atmosphere and the reaction time of 20 min
